# Supplementary material for: Organic matter and sediment properties determine in-lake variability of sediment CO 2 and CH 4 production and emissions of a small and shallow lake
Source: Copernicus journal article supplement (doi:10.5194/bg-17-5057-2020), 2020-10-20
Supplement: Supplementary file 1 [file bg-17-5057-2020-supplement.zip]

# Supporting Information to: Organic matter and sediment properties determine in-lake variability of sediment CO<sub>2</sub> and CH<sub>4</sub> production and emissions of a small and shallow lake

Leandra Stephanie Emilia Praetzel, Nora Plenter, Sabrina Schilling, Marcel Schmiedeskamp, Gabriele

5 Broll, Klaus-Holger Knorr

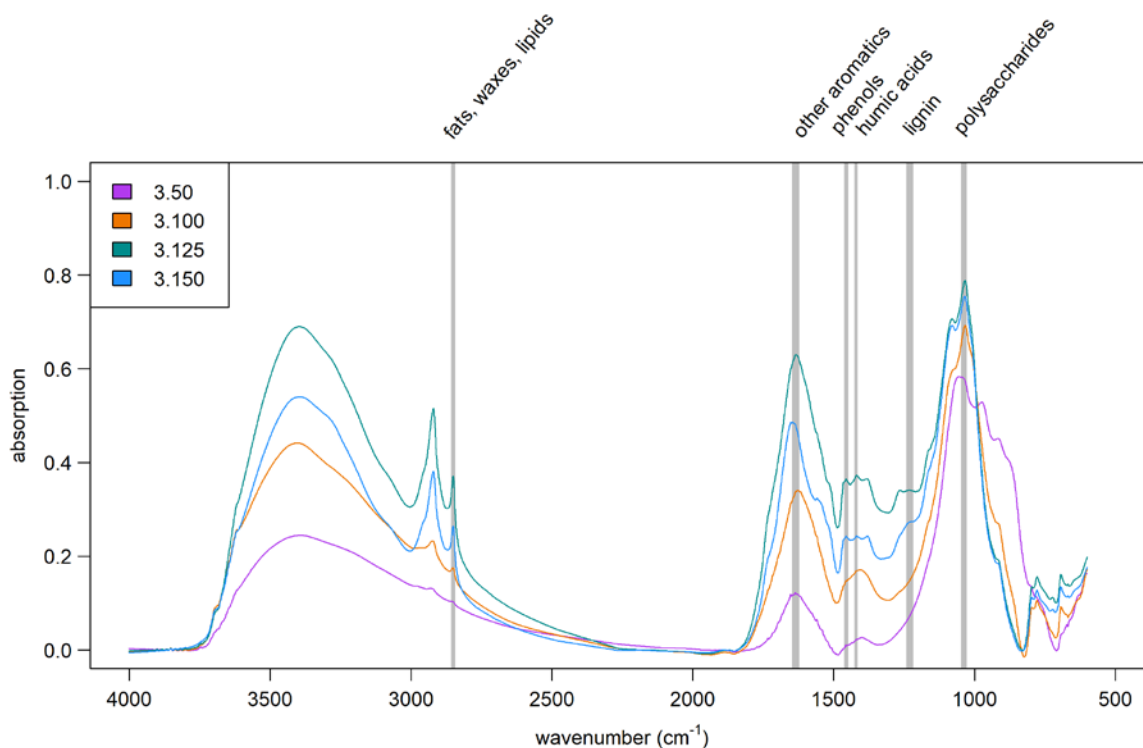

**Figure S1:** FTIR spectra of samples from transect 3.

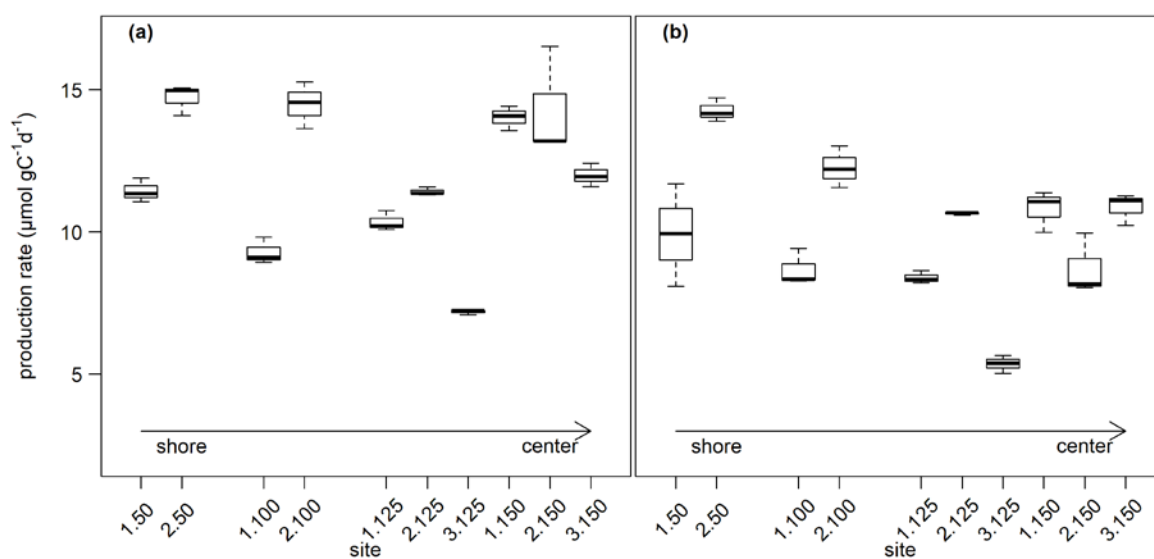

**Figure S2:** CO<sub>2</sub> (a) and CH<sub>4</sub> (b) production rates in 5-10 cm sediment depth. *n* = 3.

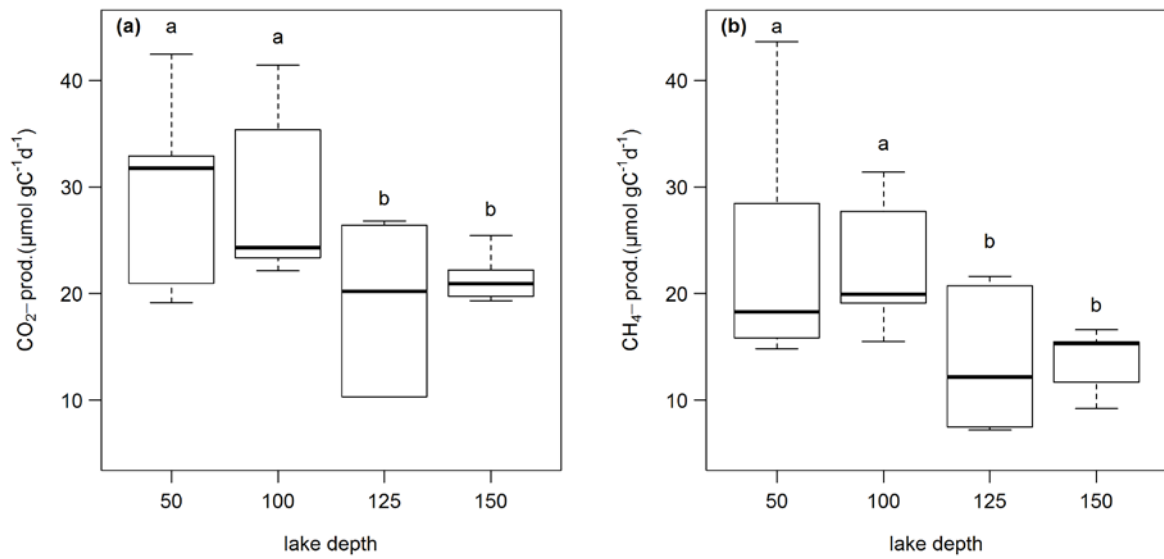

10

**Figure S3:**  $\text{CO}_2$  (a) and  $\text{CH}_4$  (b) production rates in the upper 5 cm of the sediment vs. lake depth.  $n=12$ . Different letters denote significant differences between groups.

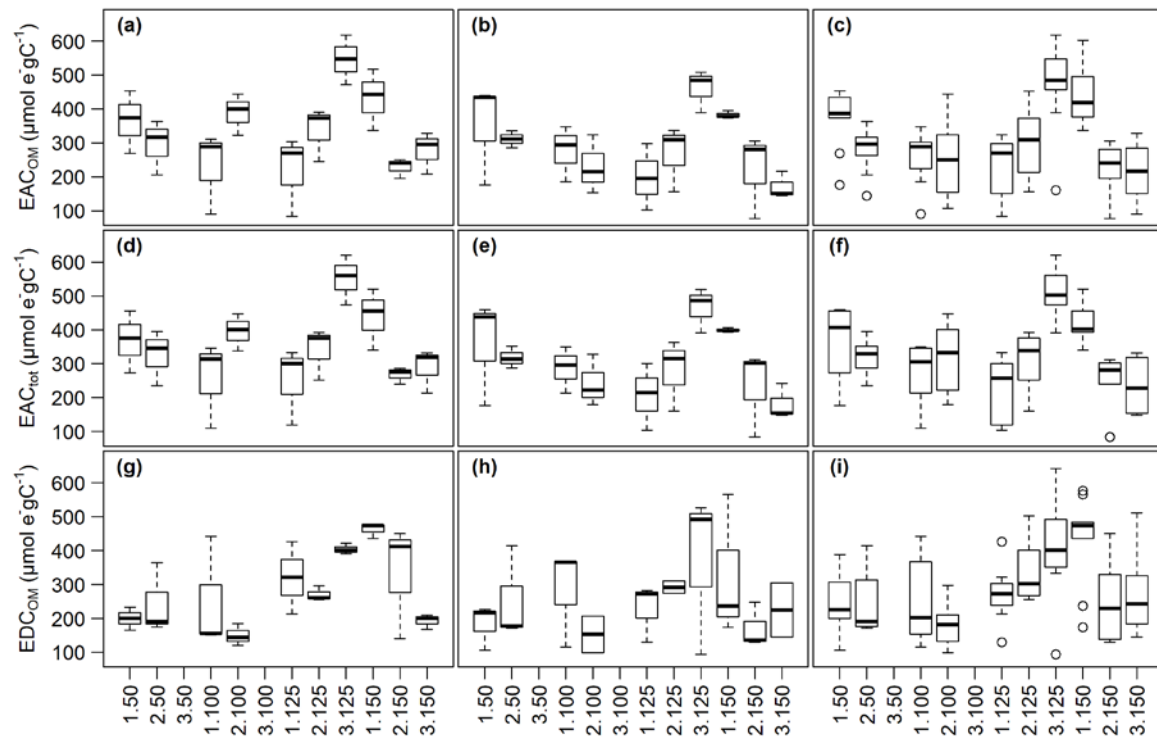

15

**Figure S4:** Spatio-temporal variability of  $\text{EAC}_{\text{OM}}$  (a, b, c),  $\text{EAC}_{\text{tot}}$  (d, e, f) and  $\text{EDC}_{\text{OM}}$  (g, h, i) in the incubation experiment at the beginning (a, d, g,  $n=3$ ), and the end (b, e, h,  $n=3$ ) of the experiment as well as average values for the whole experiment (c, f, i,  $n=6$ ).

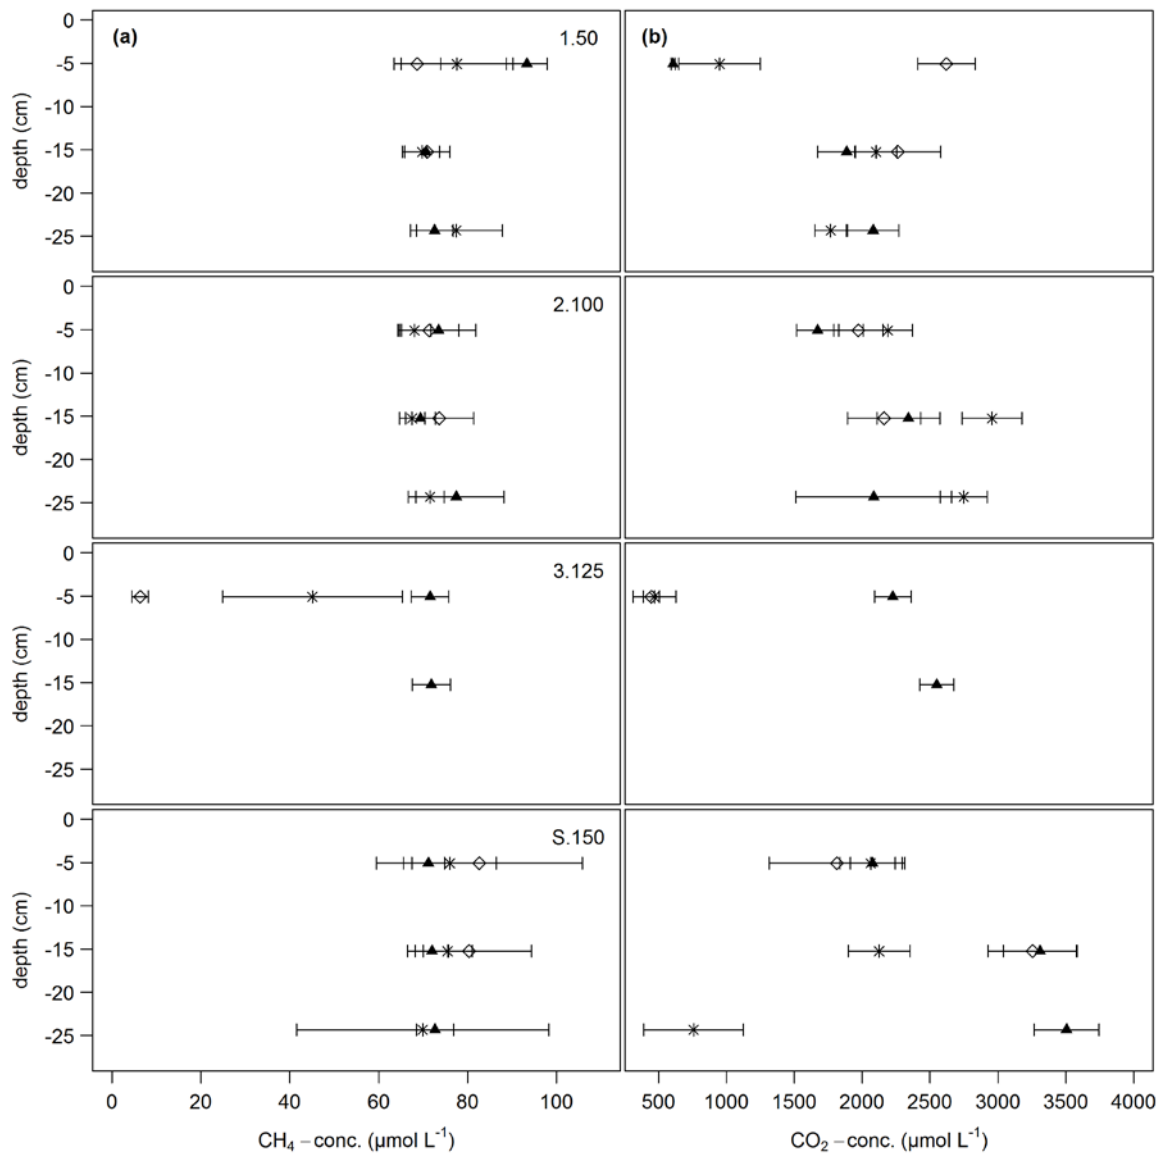

**Figure S5:** Depth profile of  $\text{CH}_4$  (a) and  $\text{CO}_2$  (b) concentration in the sediment of the mesocosms. Different symbols denote three replicates at each site. Values are means over sampling period  $\pm$  SD.  $n = 2-10$

**Table S1:** Spearman's rank correlation coefficients and significance levels for CO<sub>2</sub> and CH<sub>4</sub> production, Q<sub>10</sub>-values and EAC and EDC with all other measured parameters. n.s. means that correlations were not significant ( $p > 0.05$ ). ACM = acetoclastic methanogenesis, HTM = hydrogenotrophic methanogenesis.

|                             | CH <sub>4</sub> production |            |          | CO <sub>2</sub> production |            |          | Q <sub>10</sub> (CH <sub>4</sub> ) |            |          | EAC <sub>OM</sub> |            |          | EAC <sub>tot</sub> |            |          | EDC      |            |          |
|-----------------------------|----------------------------|------------|----------|----------------------------|------------|----------|------------------------------------|------------|----------|-------------------|------------|----------|--------------------|------------|----------|----------|------------|----------|
|                             | <i>p</i>                   | <i>rho</i> | <i>n</i> | <i>p</i>                   | <i>rho</i> | <i>n</i> | <i>p</i>                           | <i>rho</i> | <i>n</i> | <i>p</i>          | <i>rho</i> | <i>n</i> | <i>p</i>           | <i>rho</i> | <i>n</i> | <i>p</i> | <i>rho</i> | <i>n</i> |
| <b>aromatics</b>            | < 0.001                    | -0.669     | 22       | < 0.01                     | -0.641     | 22       | < 0.05                             | -0.821     | 7        | n.s.              | 0.030      | 10       | n.s.               | 0.042      | 10       | n.s.     | 0.515      | 10       |
| <b>fats, waxes, lipids</b>  | < 0.001                    | -0.700     | 22       | < 0.001                    | -0.736     | 22       | < 0.05                             | -0.821     | 7        | n.s.              | 0.321      | 10       | n.s.               | 0.333      | 10       | < 0.05   | 0.758      | 10       |
| <b>humic acids</b>          | < 0.01                     | -0.618     | 22       | < 0.01                     | -0.653     | 22       | < 0.05                             | -0.821     | 7        | n.s.              | 0.067      | 10       | n.s.               | 0.042      | 10       | n.s.     | 0.455      | 10       |
| <b>lignin</b>               | < 0.01                     | -0.606     | 22       | < 0.01                     | -0.610     | 22       | < 0.05                             | -0.821     | 7        | n.s.              | 0.031      | 10       | n.s.               | -0.006     | 10       | n.s.     | 0.275      | 10       |
| <b>phenols</b>              | < 0.01                     | -0.606     | 22       | < 0.001                    | -0.667     | 22       | < 0.05                             | -0.821     | 7        | n.s.              | 0.152      | 10       | n.s.               | 0.115      | 10       | n.s.     | 0.479      | 10       |
| <b>C</b>                    | n.s.                       | -0.287     | 22       | n.s.                       | -0.219     | 22       | n.s.                               | -0.393     | 7        | n.s.              | -0.394     | 10       | n.s.               | -0.370     | 10       | n.s.     | -0.321     | 10       |
| <b>C/N</b>                  | n.s.                       | -0.206     | 22       | n.s.                       | -0.197     | 22       | n.s.                               | -0.074     | 7        | n.s.              | -0.079     | 10       | n.s.               | -0.115     | 10       | n.s.     | -0.103     | 10       |
| <b>δ<sup>13</sup>C</b>      | n.s.                       | 0.134      | 22       | n.s.                       | 0.091      | 22       | n.s.                               | -0.321     | 7        | n.s.              | 0.309      | 10       | n.s.               | 0.224      | 10       | n.s.     | 0.164      | 10       |
| <b>δ<sup>15</sup>N</b>      | n.s.                       | -0.267     | 22       | n.s.                       | -0.281     | 22       | n.s.                               | -0.071     | 7        | n.s.              | 0.055      | 10       | n.s.               | -0.006     | 10       | n.s.     | -0.164     | 10       |
| <b>H<sub>2</sub> conc.</b>  | < 0.001                    | 0.450      | 22       | < 0.001                    | 0.515      | 22       |                                    |            |          | n.s.              | -0.285     | 26       | n.s.               | -0.335     | 26       | n.s.     | -0.139     | 26       |
| <b>acetate conc.</b>        | n.s.                       | 0.248      | 10       | n.s.                       | 0.455      | 10       |                                    |            |          | < 0.01            | -0.387     | 60       | < 0.001            | -0.418     | 60       | n.s.     | -0.035     | 60       |
| <b>HTM</b>                  | < 0.01                     | -0.394     | 22       | < 0.001                    | -0.516     | 22       |                                    |            |          | < 0.05            | 0.426      | 26       | < 0.05             | 0.426      | 26       | n.s.     | 0.162      | 26       |
| <b>ACM</b>                  | n.s.                       | 0.491      | 10       | n.s.                       | 0.297      | 10       |                                    |            |          | n.s.              | 0.042      | 60       | n.s.               | 0.042      | 60       | n.s.     | -0.208     | 60       |
| <b>EAC<sub>OM</sub></b>     | n.s.                       | 0.030      | 10       | n.s.                       | -0.261     | 10       |                                    |            |          |                   |            |          |                    |            |          |          |            |          |
| <b>EAC<sub>inorg</sub></b>  | n.s.                       | -0.261     | 10       | n.s.                       | 0.152      | 10       |                                    |            |          |                   |            |          |                    |            |          |          |            |          |
| <b>EAC<sub>tot</sub></b>    | n.s.                       | -0.042     | 10       | n.s.                       | -0.285     | 10       |                                    |            |          |                   |            |          |                    |            |          |          |            |          |
| <b>EDC</b>                  | < 0.05                     | -0.697     | 10       | < 0.05                     | -0.673     | 10       |                                    |            |          |                   |            |          |                    |            |          |          |            |          |
| <b>EAC/EDC</b>              | n.s.                       | 0.406      | 10       | n.s.                       | 0.297      | 10       |                                    |            |          |                   |            |          |                    |            |          |          |            |          |
| <b>EEC</b>                  | n.s.                       | -0.479     | 10       | n.s.                       | -0.636     | 10       |                                    |            |          |                   |            |          |                    |            |          |          |            |          |
| <b>S</b>                    | n.s.                       | -0.411     | 16       | < 0.05                     | -0.446     | 16       |                                    |            |          |                   |            |          |                    |            |          |          |            |          |
| <b>P</b>                    | n.s.                       | 0.282      | 22       | n.s.                       | 0.305      | 22       |                                    |            |          |                   |            |          |                    |            |          |          |            |          |
| <b>Fe</b>                   | n.s.                       | 0.338      | 22       | < 0.05                     | 0.453      | 22       |                                    |            |          |                   |            |          |                    |            |          |          |            |          |
| <b>Mn</b>                   | n.s.                       | 0.020      | 22       | n.s.                       | 0.121      | 22       |                                    |            |          |                   |            |          |                    |            |          |          |            |          |
| <b>CO<sub>2</sub> conc.</b> |                            |            |          |                            |            |          |                                    |            |          | n.s.              | -0.161     | 20       | n.s.               | -0.146     | 20       | n.s.     | -0.252     | 20       |
| <b>CH<sub>4</sub> conc.</b> |                            |            |          |                            |            |          |                                    |            |          | n.s.              | -0.083     | 20       | n.s.               | -0.080     | 20       | n.s.     | -0.219     | 20       |

*Table S2: Spearman's rank correlation coefficients and significance levels for Gibb's free energy of acetoclastic (ACM) and hydrogenotrophic (HTM) methanogenesis, acetate and H<sub>2</sub> concentrations with OM quality parameters. n.s. means that correlations were not significant ( $p > 0.05$ ).*

|                            | ACM (t6)    |            |          | acetate conc. (t6) |            |          | HTM         |            |          | H <sub>2</sub> conc. |            |          |
|----------------------------|-------------|------------|----------|--------------------|------------|----------|-------------|------------|----------|----------------------|------------|----------|
|                            | <i>p</i>    | <i>rho</i> | <i>n</i> | <i>p</i>           | <i>rho</i> | <i>n</i> | <i>p</i>    | <i>rho</i> | <i>n</i> | <i>p</i>             | <i>rho</i> | <i>n</i> |
| <b>aromatics</b>           | <i>n.s.</i> | -0.052     | 30       | < 0.001            | -0.585     | 30       | <i>n.s.</i> | 0.136      | 154      | < 0.05               | -0.187     | 174      |
| <b>fats, waxes, lipids</b> | <i>n.s.</i> | -0.237     | 30       | < 0.05             | -0.440     | 30       | < 0.01      | 0.255      | 154      | < 0.001              | -0.352     | 174      |
| <b>humic acids</b>         | <i>n.s.</i> | 0.082      | 30       | < 0.001            | -0.634     | 30       | < 0.05      | 0.183      | 154      | < 0.01               | -0.229     | 174      |
| <b>lignin</b>              | <i>n.s.</i> | 0.265      | 30       | < 0.01             | -0.533     | 30       | <i>n.s.</i> | 0.140      | 154      | < 0.05               | -0.190     | 174      |
| <b>phenols</b>             | <i>n.s.</i> | 0.104      | 30       | < 0.001            | -0.668     | 30       | < 0.05      | 0.196      | 154      | < 0.01               | -0.246     | 174      |
| <b>C</b>                   | <i>n.s.</i> | -0.062     | 30       | <i>n.s.</i>        | 0.074      | 30       | < 0.05      | 0.174      | 154      | < 0.05               | -0.149     | 174      |
| <b>C/N</b>                 | < 0.05      | 0.447      | 30       | < 0.01             | -0.538     | 30       | <i>n.s.</i> | -0.057     | 154      | <i>n.s.</i>          | 0.102      | 174      |
