# Supplementary material for: Organic matter and sediment properties determine in-lake variability of sediment CO 2 and CH 4 production and emissions of a small and shallow lake
Source: Copernicus journal article supplement (doi:10.5194/bg-17-5057-2020), 2020-10-20
Supplement: Supplementary file 2 [file bg-17-5057-2020-supplement.zip]

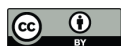

## *Supplement of*

# **Organic matter and sediment properties determine in-lake variability of sediment CO<sub>2</sub> and CH<sub>4</sub> production and emissions of a small and shallow lake**

**Leandra Stephanie Emilia Praetzel et al.**

*Correspondence to:* Leandra Stephanie Emilia Praetzel ([leandra.praetzel@uni-muenster.de](mailto:leandra.praetzel@uni-muenster.de)) and Klaus-Holger Knorr ([kh.knorr@uni-muenster.de](mailto:kh.knorr@uni-muenster.de))

- [bg-17-5057-2020-supplement-title-page.pdf](#)
- [Supporting Information BG-2019-284\\_Revised.pdf](#)
- [Supporting Information.xlsx](#)

The copyright of individual parts of the supplement might differ from the CC BY 4.0 License.
